# Supplementary material for: High-Dimensional Analysis of Immune Cell Composition Predicts Periprosthetic Joint Infections and Dissects Its Pathophysiology
Source: MDPI journal article supplement (doi:10.3390/biomedicines8090358), 2020-09-17
Supplement: s1 [file s1]

## Supplementary data

| Marker      | Color                           | Clone    | Company       | Isotype               | Order number | Recommended concentration                          |
|-------------|---------------------------------|----------|---------------|-----------------------|--------------|----------------------------------------------------|
| CD3         | BV510                           | SK7      | Biolegend     | Mouse IgG1, $\kappa$  | 344827       | 5 $\mu$ l/10 <sup>6</sup> cells                    |
| CD14        | BV605                           | M5E2     | Biolegend     | Mouse IgG2a, $\kappa$ | 301833       | 5 $\mu$ l/10 <sup>6</sup> cells                    |
| CD56        | PE                              | HCD56    | Biolegend     | Mouse IgG1, $\kappa$  | 318305       | 5-20 $\mu$ l/10 <sup>6</sup> cells                 |
| CD45        | PerCP                           | HI30     | Biolegend     | Mouse IgG1, $\kappa$  | 304025       | 5 $\mu$ l/10 <sup>6</sup> cells                    |
| CD16        | BUV395                          | 3G8      | BD Bioscience | Mouse IgG1, $\kappa$  | 563785       | 5 $\mu$ l/10 <sup>6</sup> cells                    |
| CD8 $\beta$ | PE-Cy7                          | SIDI8BEE | Thermo Fisher | Mouse IgG1, $\kappa$  | 25-5273-41   | 5 $\mu$ l/10 <sup>5</sup> to 10 <sup>8</sup> cells |
| CD19        | BV785                           | SJ25C1   | Biolegend     | Mouse IgG1, $\kappa$  | 363027       | 5 $\mu$ l/10 <sup>6</sup> cells                    |
| CD4         | FITC                            | SK3      | Biolegend     | Mouse IgG1, $\kappa$  | 344604       | 5-20 $\mu$ l/10 <sup>6</sup> cells                 |
| HLA-DR      | AF700                           | L243     | Biolegend     | Mouse IgG2a, $\kappa$ | 307625       | 2 $\mu$ g/10 <sup>6</sup> cells                    |
| CD123       | eF450                           | 7G3      | Thermo Fisher | Mouse IgG2a, $\kappa$ | 48-1238-42   | 5 $\mu$ l/10 <sup>5</sup> to 10 <sup>8</sup> cells |
| CD11c       | PE/Dazzle 594                   | 3 9      | Biolegend     | Mouse IgG1, $\kappa$  | 301641       | 5 $\mu$ l/10 <sup>6</sup> cells                    |
| CD66b       | AF647                           | G10F5    | Biolegend     | Mouse IgM, $\kappa$   | 305109       | 5 $\mu$ l/10 <sup>6</sup> cells                    |
| Fixable dye | Zombie NIR<br>Fixable Viability |          | Biolegend     |                       | 423105       |                                                    |
| CD11b       | BV650                           | ICRF44   | Biolegend     | Mouse IgG1, $\kappa$  | 301335       | 5 $\mu$ l/10 <sup>6</sup> cells                    |

**Supplementary table 1.** Antibody details for flow cytometric analysis of joint aspirates.

| Cell population                         | Parent population                       | Cell population | Parent population |
|-----------------------------------------|-----------------------------------------|-----------------|-------------------|
| B cells                                 | non-granulocytes                        | NK cells        | non-granulocytes  |
| CD3 <sup>+</sup> cells                  | non-granulocytes                        | Monocytes       | non-granulocytes  |
| T <sub>h</sub> cells                    | non-granulocytes                        | mMDSC           | non-granulocytes  |
| T <sub>h</sub> cells                    | CD3 <sup>+</sup> cells                  | all DCs         | non-granulocytes  |
| T <sub>h</sub> cells                    | T <sub>h</sub> and T <sub>k</sub> cells | mDC             | non-granulocytes  |
| T <sub>k</sub> cells                    | non-granulocytes                        | mDC             | all DCs           |
| T <sub>k</sub> cells                    | CD3 <sup>+</sup> cells                  | pDCs            | non-granulocytes  |
| T <sub>k</sub> cells                    | T <sub>h</sub> and T <sub>k</sub> cells | pDCs            | all DCs           |
| T <sub>h</sub> and T <sub>k</sub> cells | non-granulocytes                        | Neutrophils     | all granulocytes  |
| T <sub>h</sub> and T <sub>k</sub> cells | CD3 <sup>+</sup> cells                  | Eosinophils     | all granulocytes  |
| NKT cells                               | non-granulocytes                        | Basophils       | all granulocytes  |
| NKT cells                               | CD3 <sup>+</sup> cells                  |                 |                   |

**Supplementary table 2.** Flow cytometric parameters which were used for estimation of the mean misclassification error for different classification methods.

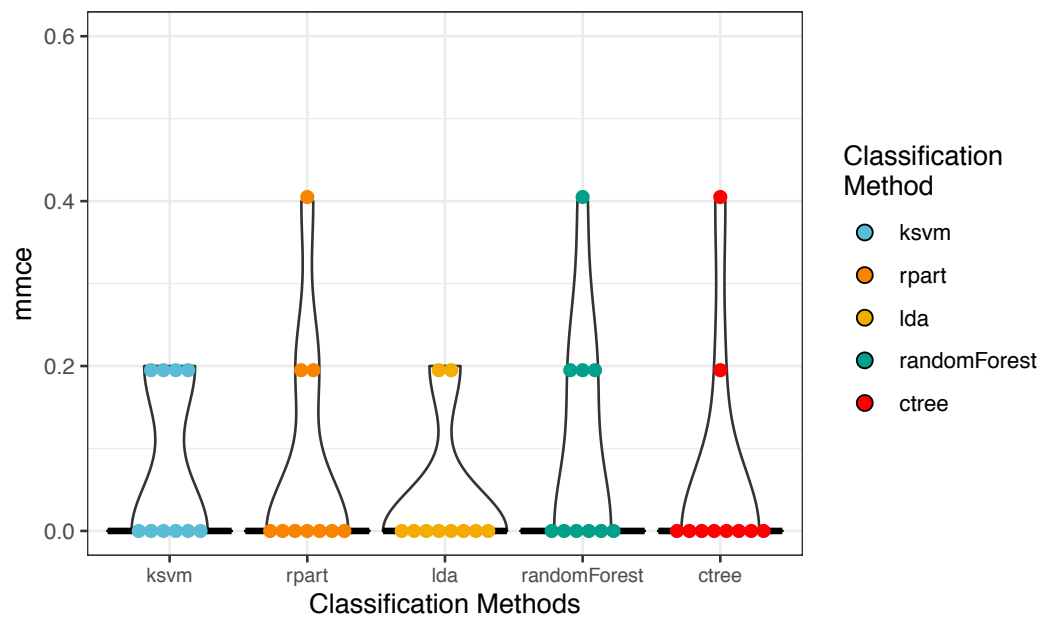

**Supplementary figure 1.** Estimation of the mean misclassification errors for 5 classification methods. The mean misclassification errors (mmce) for the five classification methods and 24 predictor variables (ksvm: Support Vector Machines, rpart: Decision Tree, lda: Linear Discriminant Analysis, randomForest: Random Forest, ctree: Conditional Inference Trees) are depicted as violin plots for all resampling iterations. Resampling strategy: 10-fold cross-validation. Each point represents an iteration.
